# Supplementary material for: Superior peroxidase mimetic activity of carbon dots–Pt nanocomposites relies on synergistic effects
Source: Royal Society of Chemistry journal article supplement (doi:10.1039/c5nj00012b), 2015-01-01
Supplement: c5nj00012b1.pdf [file c5nj00012b1.pdf]

Electronic Supplementary Information (ESI)  
for New Journal of Chemistry

**Superior Peroxidase Mimetic Activity of  
Carbon dots/Pt Nanocomposites Rely on  
Synergistic Effects**

Yuming Dong\*, Jingjing Zhang, Pingping Jiang, Guangli Wang, Xiuming Wu, Hui Zhao, Chi Zhang

Key Laboratory of Food Colloids and Biotechnology (Ministry of Education of China), School of Chemical and Material Engineering, Jiangnan University, Wuxi 214122, P. R. China. Fax: (+) 86-510-85917763. E-mail: dongym@jiangnan.edu.cn

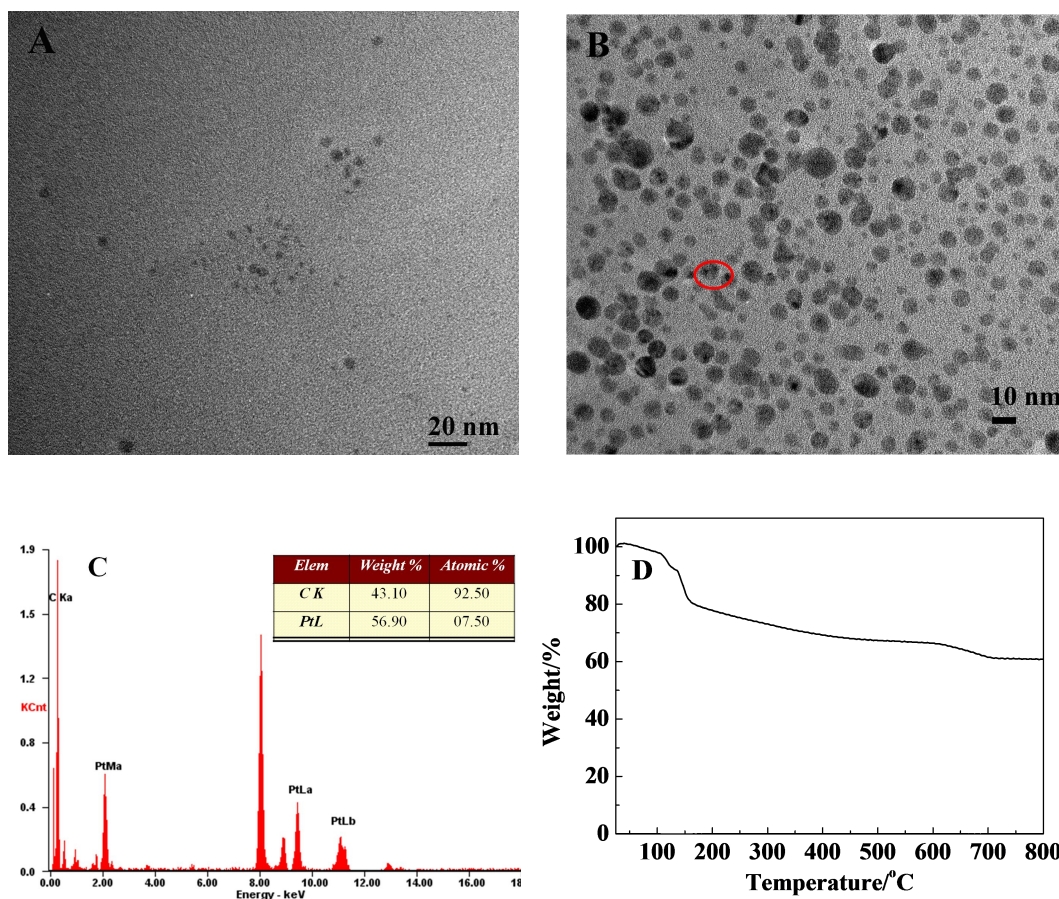

Fig.S1. TEM image of CDs (A) and CDs-Pt(B) compounds and EDX(C) and TG(D) of CDs-Pt compounds.

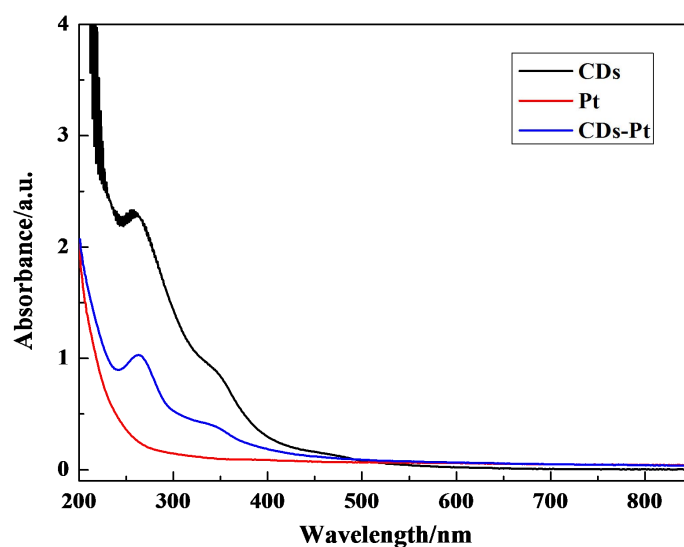

Fig.S2. UV-vis absorption spectra of CDs, Pt and CDs-Pt respectively. Concentration: [CDs-Pt] =0.18 mg/mL, [CDs] =0.015 mg/ml, [Pt] =0.16 mg/ml.

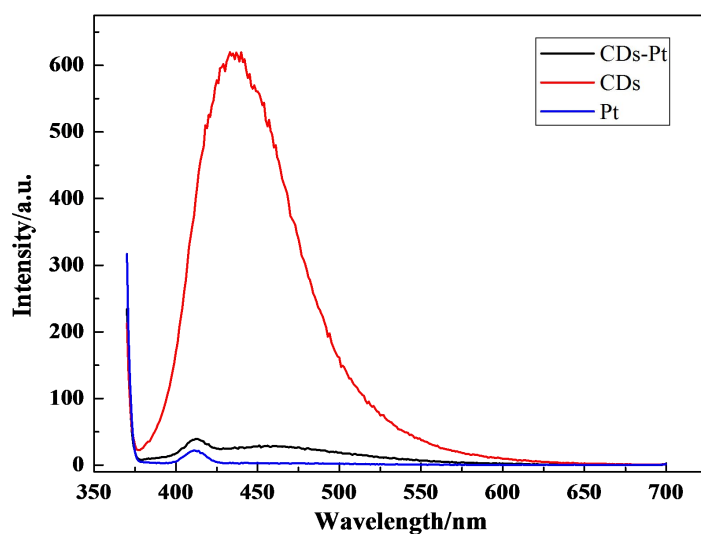

Fig.S3. Fluorescence spectra of CDs, Pt and CDs-Pt respectively (excited at 359 nm). Concentration: [CDs-Pt] =0.18 mg/mL, [CDs] =0.015 mg/ml, [Pt] =0.16 mg/ml.

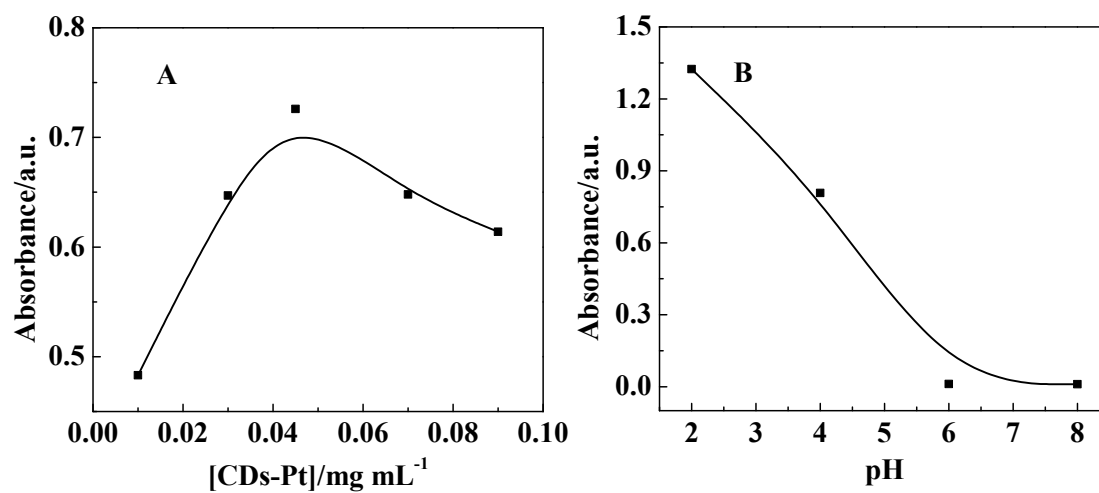

Fig.S4. The absorption intensity dependency of CDs-Pt peroxides-like activity on CDs-Pt concentration (A) and pH (B). Reaction conditions: A: 0.25 mM TMB, 50 mM H<sub>2</sub>O<sub>2</sub> in 50 mM HAc-NaAc buffer (pH 4.0) for 10 min. B: 0.25 mM TMB, [CDs-Pt] =0.045 mg/mL, 50 mM H<sub>2</sub>O<sub>2</sub> for 10 min.

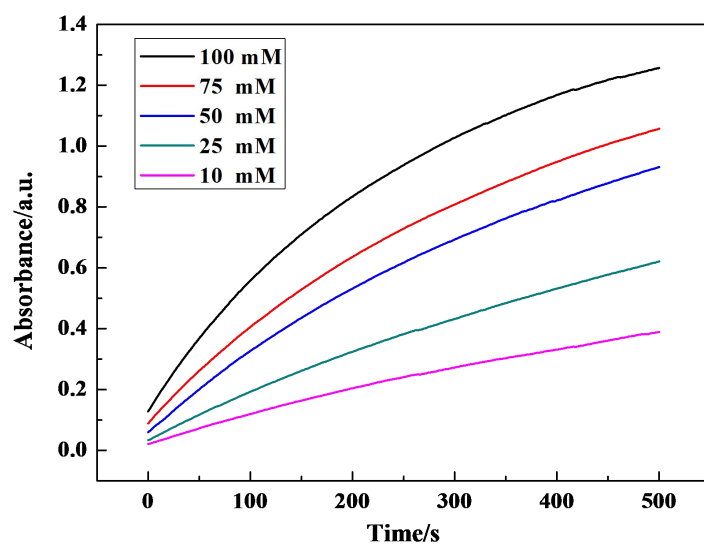

Fig.S5. Effect of hydrogen peroxide concentration on the oxidation of TMB. Reaction conditions: 0.25 mM TMB, [CDs-Pt] = 0.045 mg/mL, in 50 mM HAc-NaAc buffer (pH 4.0).

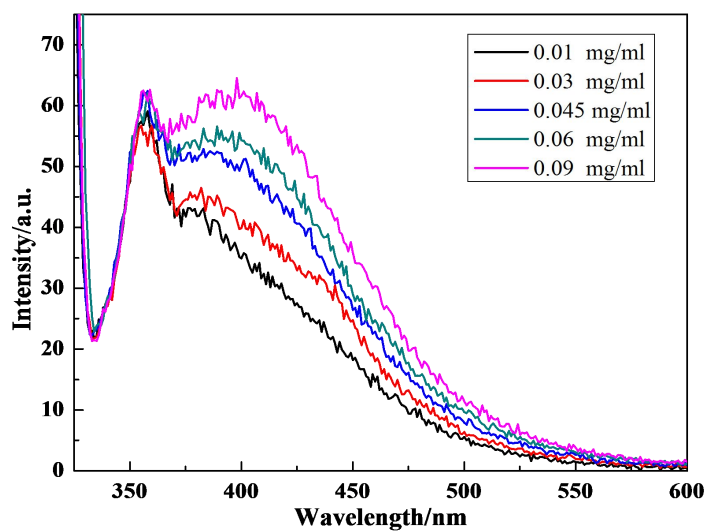

Fig.S6. The fluorescence intensity of CDs-Pt with different concentrations (excited at 315 nm).

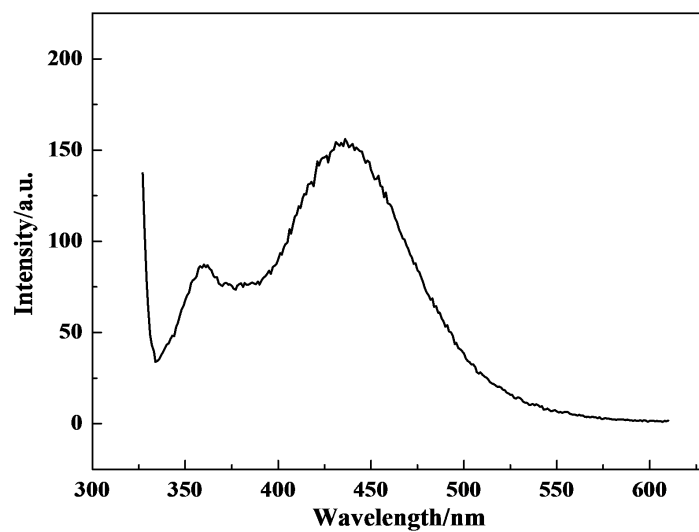

Fig.S7. The fluorescence spectrum of 2-hydroxy terephthalic acid in presence of CDs-Pt and H<sub>2</sub>O<sub>2</sub>. Reaction conditions: 50 mM H<sub>2</sub>O<sub>2</sub>, 2.5×10<sup>-4</sup> M terephthalic acid, 0.045 mg/mL CDs-Pt in 50 mM HAc-NaAc buffer (pH 4.0) for 5 min.
